# Supplementary figures and images for: Prognostic Factors and Treatment‐Effect Modifiers in Spinal Muscular Atrophy
Source: PubMed Central journal article supplement — Clin Pharmacol Ther. 2021 Jun 5;110(6):1435–54. doi: 10.1002/cpt.2247 (PMC9292571; doi:10.1002/cpt.2247), 2021-06-05

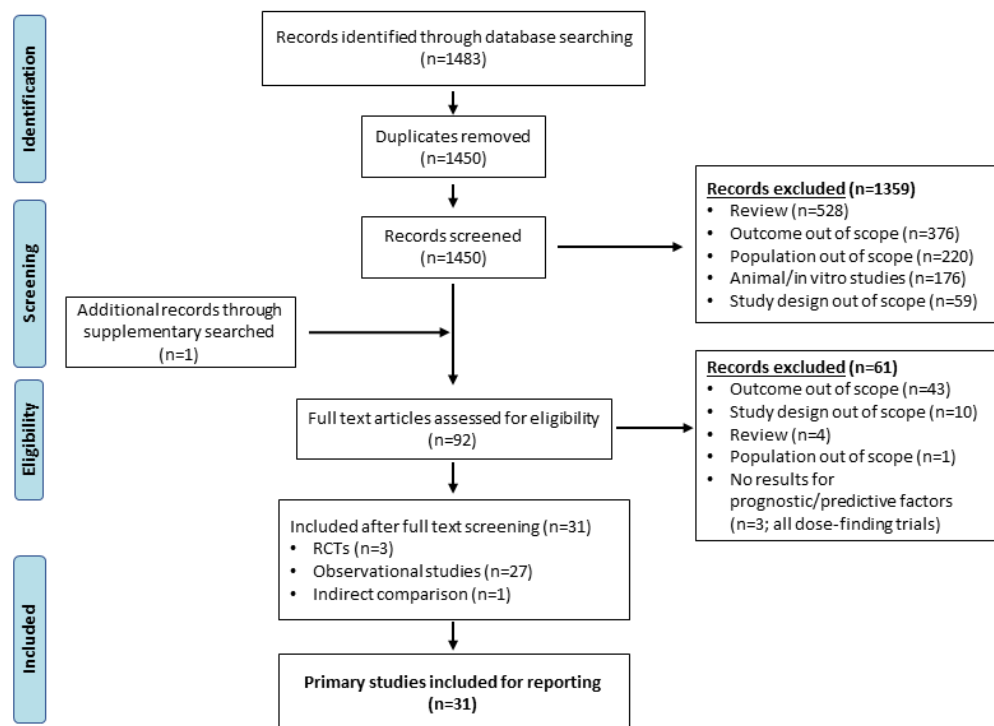

**Figure S1.** PRISMA flow diagram for the study.

Supplement: CPT-110-1435-s002.pdf [file CPT-110-1435-s002.pdf]
